# Supplementary material
Source: publisher site journal article supplement (https://www.dovepress.com/article/456939)
Supplement: Supplementary file 1 [file get_supplementary_file.php]

**Supplementary Table 1**. Respiratory infection Prevention And Control Self-efficacy, R-PACS (English version)

| No. | Item | Strongly disagree | Disagree | Neutral | Agree | Strongly agree |
| --- | --- | --- | --- | --- | --- | --- |
| 1 | I can dispose of waste from a person with respiratory infection symptoms in a separate rubbish bin, not shared with other household members. |  |  |  |  |  |
| 2 | If I have respiratory infection symptoms, I can use a designated bathroom exclusively for my use in my household. |  |  |  |  |  |
| 3 | I can securely seal the waste from a person with respiratory infection symptoms and dispose of it in an automated opening and closing rubbish bin. |  |  |  |  |  |
| 4 | If I have respiratory infection symptoms, I can consistently keep the door of my room closed. |  |  |  |  |  |
| 5 | I can properly dispose of waste from a person with respiratory infection by following expert recommendations. |  |  |  |  |  |
| 6 | Even if it is challenging, I can limit my activities at home when I have respiratory infection symptoms. |  |  |  |  |  |
| 7 | Even if I have problems in my professional or social life, I can avoid contact with many people to prevent the spread of respiratory infections. |  |  |  |  |  |
| 8 | I can always maintain a minimum distance of one meter between myself and others to prevent the spread of respiratory infections. |  |  |  |  |  |
| 9 | I can refrain from touching my eyes, nose, or mouth under any circumstances to prevent the spread of respiratory infections. |  |  |  |  |  |
| 10 | I can adhere to government instructions and only go out when permitted. |  |  |  |  |  |
| 11 | Whenever I cough or sneeze, I can cover my mouth and nose with a tissue or use my inner elbow. |  |  |  |  |  |
| 12 | I can consistently and thoroughly wash my hands with soap, water, or alcohol-based hand hygiene products wherever I go. |  |  |  |  |  |
| 13 | I understand that anyone with respiratory infection symptoms must wear a mask and gloves when leaving the room, without exceptions. |  |  |  |  |  |
| 14 | I can promptly recognize the appearance of respiratory infection symptoms, such as fever, cough, or sore throat. |  |  |  |  |  |
| 15 | As recommended by health authorities, I can either seek medical attention or make an emergency call when I have respiratory infection symptoms. |  |  |  |  |  |
| 16 | As recommended by health authorities, I can decide whether my situation requires maintaining my normal routine life or making an emergency call. |  |  |  |  |  |

**Supplementary Table 2**. Respiratory infection Prevention And Control Self-efficacy, R-PACS (Korean version)

| 번호 | 문항 | 전혀  그렇지  않다 | 대체로  그렇지  않다 | 보통  이다 | 대체로 그렇다 | 매우  그렇다 |
| --- | --- | --- | --- | --- | --- | --- |
| 1 | 나는 호흡기감염 증상이 있는 사람의 쓰레기는 가족 구성원과 공유하지 않는 쓰레기통에 버릴 수 있다. |  |  |  |  |  |
| 2 | 나는 호흡기감염 증상이 있다면, 전용 욕실을 사용할 수 있다. |  |  |  |  |  |
| 3 | 나는 호흡기감염 증상이 있는 사람의 쓰레기는 밀봉하여 자동 개폐되는 쓰레기통에 버릴 수 있다. |  |  |  |  |  |
| 4 | 나는 호흡기감염 증상이 있다면, 방의 문을 항상 닫을 수 있다. |  |  |  |  |  |
| 5 | 나는 전문가의 권고사항에 따라 호흡기감염 쓰레기를 처리할 수 있다. |  |  |  |  |  |
| 6 | 나는 호흡기감염 증상이 있다면, 어렵더라도 집에서도 활동을 제한할 수 있다. |  |  |  |  |  |
| 7 | 나는 내 직업이나 사회생활에서 문제가 생긴다고 해도 호흡기감염을 예방하기 위해 많은 사람과의 접촉을 피할 수 있다. |  |  |  |  |  |
| 8 | 나는 호흡기감염을 예방하기 위해 항상 다른 사람과 나 사이의 거리를 적어도 1M(미터) 이상 유지할 수 있다. |  |  |  |  |  |
| 9 | 나는 호흡기감염을 예방하기 위해 어떤 상황에서나 나의 눈, 코, 입을 만지지 않을 수 있다. |  |  |  |  |  |
| 10 | 나는 정부의 지시에 따르고, 허용범위에 따라서 외출할 수 있다. |  |  |  |  |  |
| 11 | 나는 기침이나 재채기를 할 때마다 휴지 또는 나의 팔꿈치를 구부려 입과 코를 가릴 수 있다. |  |  |  |  |  |
| 12 | 나는 어디를 가든지 비누와 물이나 알코올이 포함된 손 위생용품을 이용해 손을 정기적으로 철저하게 씻을 수 있다. |  |  |  |  |  |
| 13 | 나는 호흡기감염 증상이 있는 사람은 예외 없이 방을 나설 때 마스크와 글러브를 써야 하는 것을 알고 있다. |  |  |  |  |  |
| 14 | 나는 호흡기감염 증상(발열, 기침, 목 아픔 등)이 나타나면 빨리 알아챌 수 있다. |  |  |  |  |  |
| 15 | 나는 보건당국의 권고에 따라 호흡기감염 증상이 있을 때 의사를 찾아가거나 응급 전화를 할 수 있다. |  |  |  |  |  |
| 16 | 나는 보건당국의 권고에 따라 내 현재 상황이 일상생활을 유지해도 되는지, 응급 전화를 해야 하는지에 대해서 결정할 수 있다. |  |  |  |  |  |
